# Supplementary material for: Recent Changes in Storm Track over the Southeast Europe: A Mechanism for Changes in Extreme Cyclone Variability
Source: MDPI journal article supplement (doi:10.3390/atmos12101362), 2021-10-18
Supplement: s1 [file s1]

# Supplementary Materials: Recent Changes in Storm Track over the Southeast Europe: A Mechanism for Changes in Extreme Cyclone Variability

Mihaela Caian, Florinela Georgescu, Mirela Pietrisi and Oana Catrina

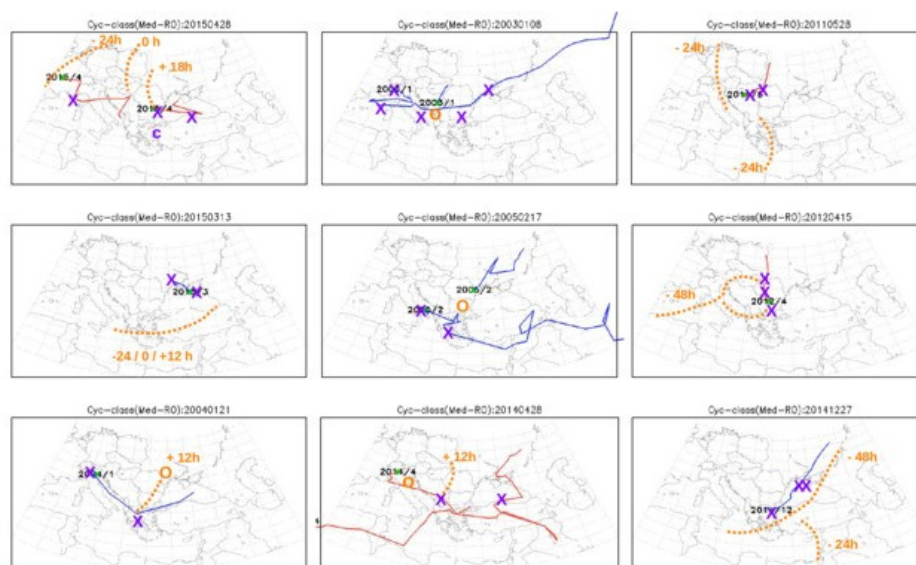

**Figure S1.** Validation of storm track classes from Catrina et al, 2019. Computed trajectories are blue/ red lines for winter/ summer events; plum cross represents the track position from meteorological analysis in (Catrina et al, 2019); orange circle represents secondary cyclonic forcing position present in the same time, interacting with the track, but not identified as cyclone center; orange dot lines indicate larger-scale context previous or during to the track (lead time is written in orange, in hours).

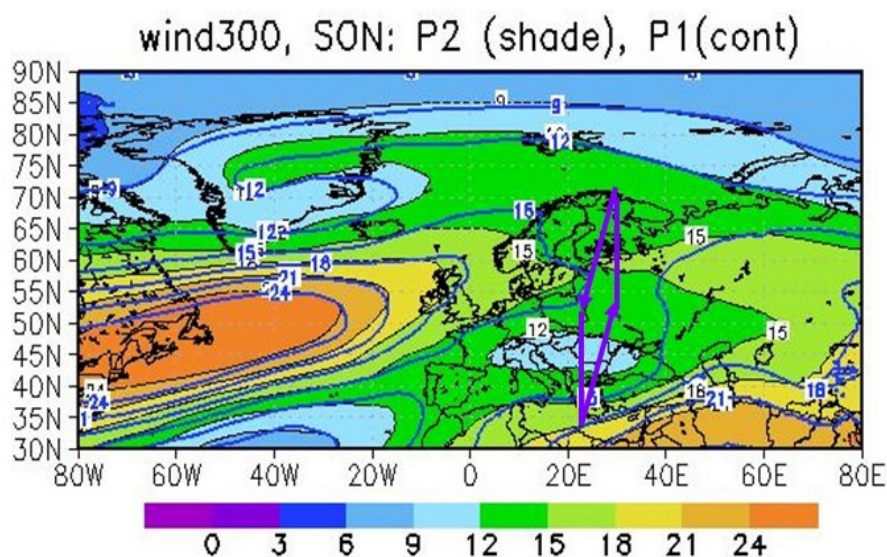

**Figure S2.** Represents the same as in Figure 11 for average months SON. In plum is schematised the ageostrophic coupled circulation of the two jets.

**Table S1.** Trends of atmospheric modes ( $\text{year}^{-1}$ ) over P0, P1 and P2 for the two seasons ONDJFM (w) and AMJJAS (s) (modes index data from <https://www.cpc.ncep.noaa.gov/products/precip/Cwlink>, accessed on 8 August 2021). Trends below 0.01 in absolute value are only specified as sign.

| mode  | P0 w   | P0 s   | P1 w  | P1 s  | P2 w   | P2 s   |
|-------|--------|--------|-------|-------|--------|--------|
| nao   | +      | -      | +     | -     | 0.050  | -      |
| AO    | +      | +      | 0.024 | -     | 0.037  | -      |
| PE    | -0.019 | -      | 0.018 | +     | -0.021 | -0.020 |
| SCAN  | +      | -      | +     | +     | -      | -0.022 |
| EA    | 0.013  | 0.032  | +     | +     | +      | 0.037  |
| EAWR  | -      | -0.021 | 0.017 | 0.015 | -      | -0.036 |
| AMOs  | 0.012  | 0.013  | 0.012 | 0.012 | +      | +      |
| AMOns | 0.012  | 0.011  | 0.014 | 0.013 | +      | +      |
| AMOna | 0.012  | 0.011  | 0.015 | 0.014 | +      | +      |

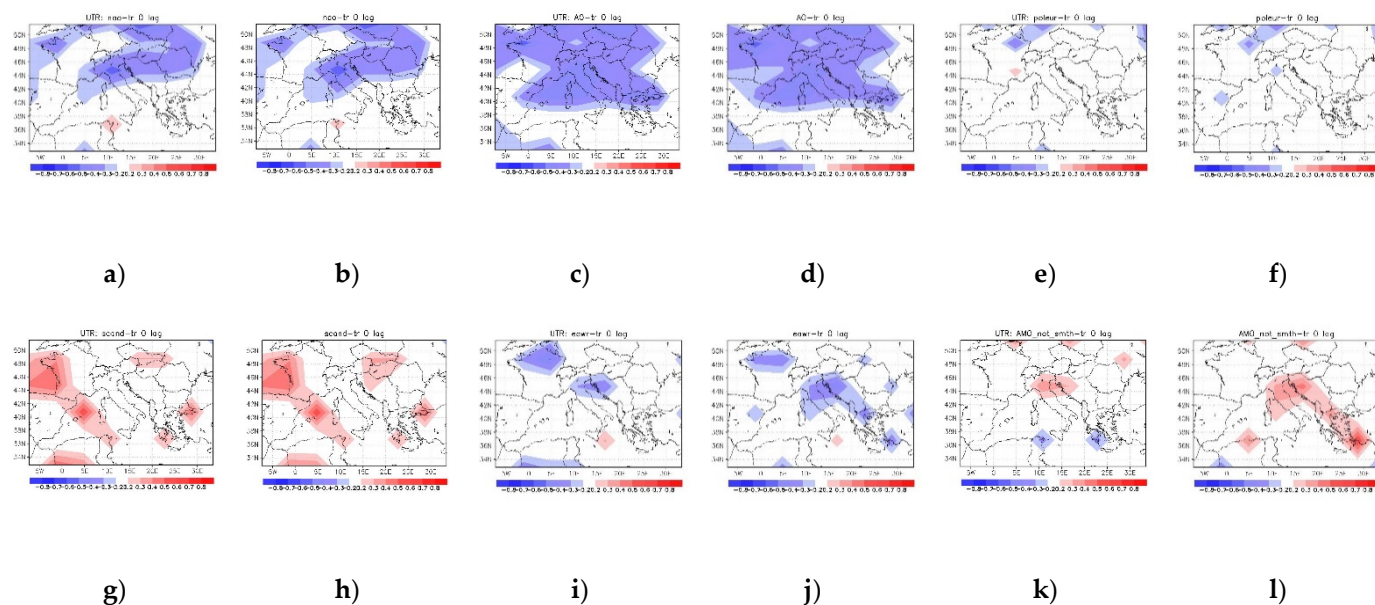

**Figure S3.** Yearly correlations over P0: 0 lag between yearly means of the atmospheric modes and the mean number of tracks in boxes of 6x4 degrees lon/lat. The modes are: NAO (a,b), AO (c,d), PE (e,f), SCAND (g,h), EAWR (i,j), AMO (k,l). For each mode, the first plot is for detrended data (a,c,e,g,i,k), second for trended (b,d,f,h,j,l).
